# Supplementary material
Source: PubMed Central journal article supplement (PMC6664447)
Supplement: NIHMS1525273-supplement-8.pdf [file NIHMS1525273-supplement-8.pdf]

**Table S1. Nomenclature of Extracellular Vesicles and Nanoparticles**

| Name                   | Category      | EV class <sup>a</sup> | Size                         | Typical sedimentation              | Protein markers                                 | Biogenesis      | Comments                                                                                                            | Principal References                                   |
|------------------------|---------------|-----------------------|------------------------------|------------------------------------|-------------------------------------------------|-----------------|---------------------------------------------------------------------------------------------------------------------|--------------------------------------------------------|
| Classical exosome      | Exosome       | Small EV              | 40 - 150 nm                  | 100,000 - 200,000 × g <sup>c</sup> | CD63, (CD81, CD9)                               | MVE             | CD63 generally most accepted, CD81 and CD9 likely less specific but present. CD63 strongly labels MVEs <sup>h</sup> | Kowal et al 2016, van Niel et al 2018, this work       |
| Non-classical exosome  | Exosome       | Small EV              | 40 - 150 nm                  | 100,000 - 200,000 × g              | ? (CD63-, CD81- and CD9-negative)               | MVE             | Hypothetical CD63/CD81/CD9-negative exosome. Subpopulations of ILVs and MVEs may exist <sup>i</sup>                 | van Niel et al 2011, Edgar et al 2014, this work       |
| Classical microvesicle | Microvesicle  | Large EV              | ~ 150 - 1000 nm <sup>b</sup> | 10,000 - 20,000 × g                | Annexin A1, (ARF6, Annexin A2?)                 | Plasma membrane | This work identifies Annexin A1 as a marker of classical microvesicles                                              | Muralidharan-Charivan et al 2009, this work            |
| Large oncosome         | Microvesicle  | Large EV              | 1 - 10 μm                    | 10,000 × g                         | Annexin A1, (ARF6, Annexin A2?)                 | Plasma membrane | This work identifies Annexin A1 as a likely marker of large oncosomes                                               | Minciacci et al 2015, Miniciacci et al 2017, this work |
| ARMM                   | Microvesicle  | Small EV              | ~ 40 - 100 nm                | 100,000 - 200,000 × g              | ARRDC1, (TSG101) <sup>f</sup>                   | Plasma membrane | Small EV-sized budding microvesicles that depend on ARRDC1 and TSG101 for biogenesis                                | Nabhan et al 2012, Wang and Lu 2017, this work         |
| Apoptotic body         | Apoptotic EV  | Large EV              | 1 - 5 μm                     | 1,000 - 10,000 × g                 | Annexin V (PS exposure)                         | Apoptosis       | Generally accepted size range for apoptotic bodies                                                                  | Hristov et al 2004, Crescitelli et al 2013,            |
| Apoptotic vesicle      | Apoptotic EV  | Small to large EV     | ~ 100 - 1000 nm              | 10,000 - 200,000 × g <sup>d</sup>  | Annexin V (PS exposure)                         | Apoptosis       | Apoptosis-related vesicle, this work demonstrates classical exosomes do not express Annexin V <sup>j</sup>          | Hristov et al 2004, Schiller et al 2008, this work     |
| Autophagic EV          | Autophagic EV | Small to large EV     | 40 - 1000 nm?                | 10,000 - 200,000 × g <sup>e</sup>  | LC3B-PE, p62                                    | Autophagy       | Does not express CD63, CD81 and CD9. extracellular release is induced by inhibition of autophagic flux              | Hessvik et al 2016, this work                          |
| Exomere                | Nanoparticle  | Non-EV                | ~ 35 - 50 nm                 | 100,000 - 200,000 × g              | HSP90, HSPA13 <sup>g</sup>                      | Unknown         | Perhaps represents composite/aggregation of secreted proteins and extracellular debris                              | Zhang et al 2018, Zhang et al 2019, this work          |
| NV fractions           | Nanoparticle  | Non-EV                | ? (vaults: ~ 70 nm)          | 100,000 - 200,000 × g              | Fibronectin, Histones, MVP, HSPA13 <sup>g</sup> | Unknown         | Perhaps represents composite/aggregation of secreted proteins and extracellular debris including vaults             | This work                                              |

EV, extracellular vesicle; sEV, small extracellular vesicle; MVE, multivesicular endosome; SIM, Structured Illumination Microscopy; ARMM, arrestin-domain-containing protein 1 (ARRDC1)-mediated microvesicle; PS, phosphatidylserine; NV, non-vesicular.

<sup>a</sup>The terms Small EV (<200 nm) and Large EV (>200 nm) for lipid bilayer-delimited extracellular vesicles (EVs) are somewhat arbitrary but widely adopted. In this work, samples were passed through a 220 nm pore filter before isolation of small EV samples.

<sup>b</sup>In this work, we observe Annexin A1-positive vesicles down to about 150 nm in size using SIM, which is at the resolution limit of reliable identification of a vesicle budding from the plasma membrane. Better resolution may allow <150 nm classical microvesicles to be observed.

<sup>c</sup>Significant sedimentation of exosomes/sEVs occurs already at 33,000 × g (Jeppesen et al 2014a). Differential ultracentrifugation will produce enrichment of specific EVs but is incapable of generating samples of purely one type of EV.

<sup>d</sup>Presumed, based on the size-range of vesicles bearing Annexin V.

<sup>e</sup>Presumed, based on the size-range of vesicles bearing LC3B-PE.

<sup>f</sup>In this work, we demonstrate that at least some ARRDC1-positive sEVs also express CD9 and CD81. In particular, CD9-positive sEVs from the Gli36 cell line strongly expressed ARRDC1. The expression of TSG101 was very low in CD63- and CD81-positive sEVs but robust in CD9-positive sEVs.

<sup>g</sup>HSP90 was associated with exomeres (Zhang et al 2018) and is absent from classical exosomes (this work). HSPA13 was associated with exomeres (Zhang et al 2018, Zhang et al 2019), and NV fractions (this work). Other heat shock proteins may be associated with exosomes or sEVs, including HSC70 (Kowal et al 2016, this work).

<sup>h</sup>In this work, we demonstrate that some CD63-positive organelles also stain for LC3B, indicative of amphisomes - the fusion products of MVEs and autophagosomes. However, CD63-positive exosomes do not express LC3B-PE.

<sup>i</sup>There is evidence for CD63-dependent and -independent ILVs (van Niel et al 2011), and for CD63-dependent and Hrs-dependent subpopulations of ILVs in the same MVEs (Edgar et al 2014). sEVs that are distinct from classical exosomes must be significant carriers of extracellular proteins previously associated with exosomes (this work), but these sEVs could be non-classical, MVE-derived, exosome.

<sup>j</sup>At least under conditions where apoptosis is not deliberately induced. In this work, we demonstrate that classical exosomes do express Annexin V, but Annexin V is present in gradient purified sEV fractions.

### Table S1. Nomenclature of Extracellular Vesicles and Nanoparticles, Related to Figures 1-7.

Nomenclature of terms used to describe extracellular vesicles and nanoparticles in the context of this study. Note that the term 'extracellular vesicles' refers exclusively to lipid bilayer-membrane enclosed vesicles and thus distinct from non-membrane enclosed nanoparticles such as exomeres and the NV fractions, and from lipoprotein complexes such as HDL.

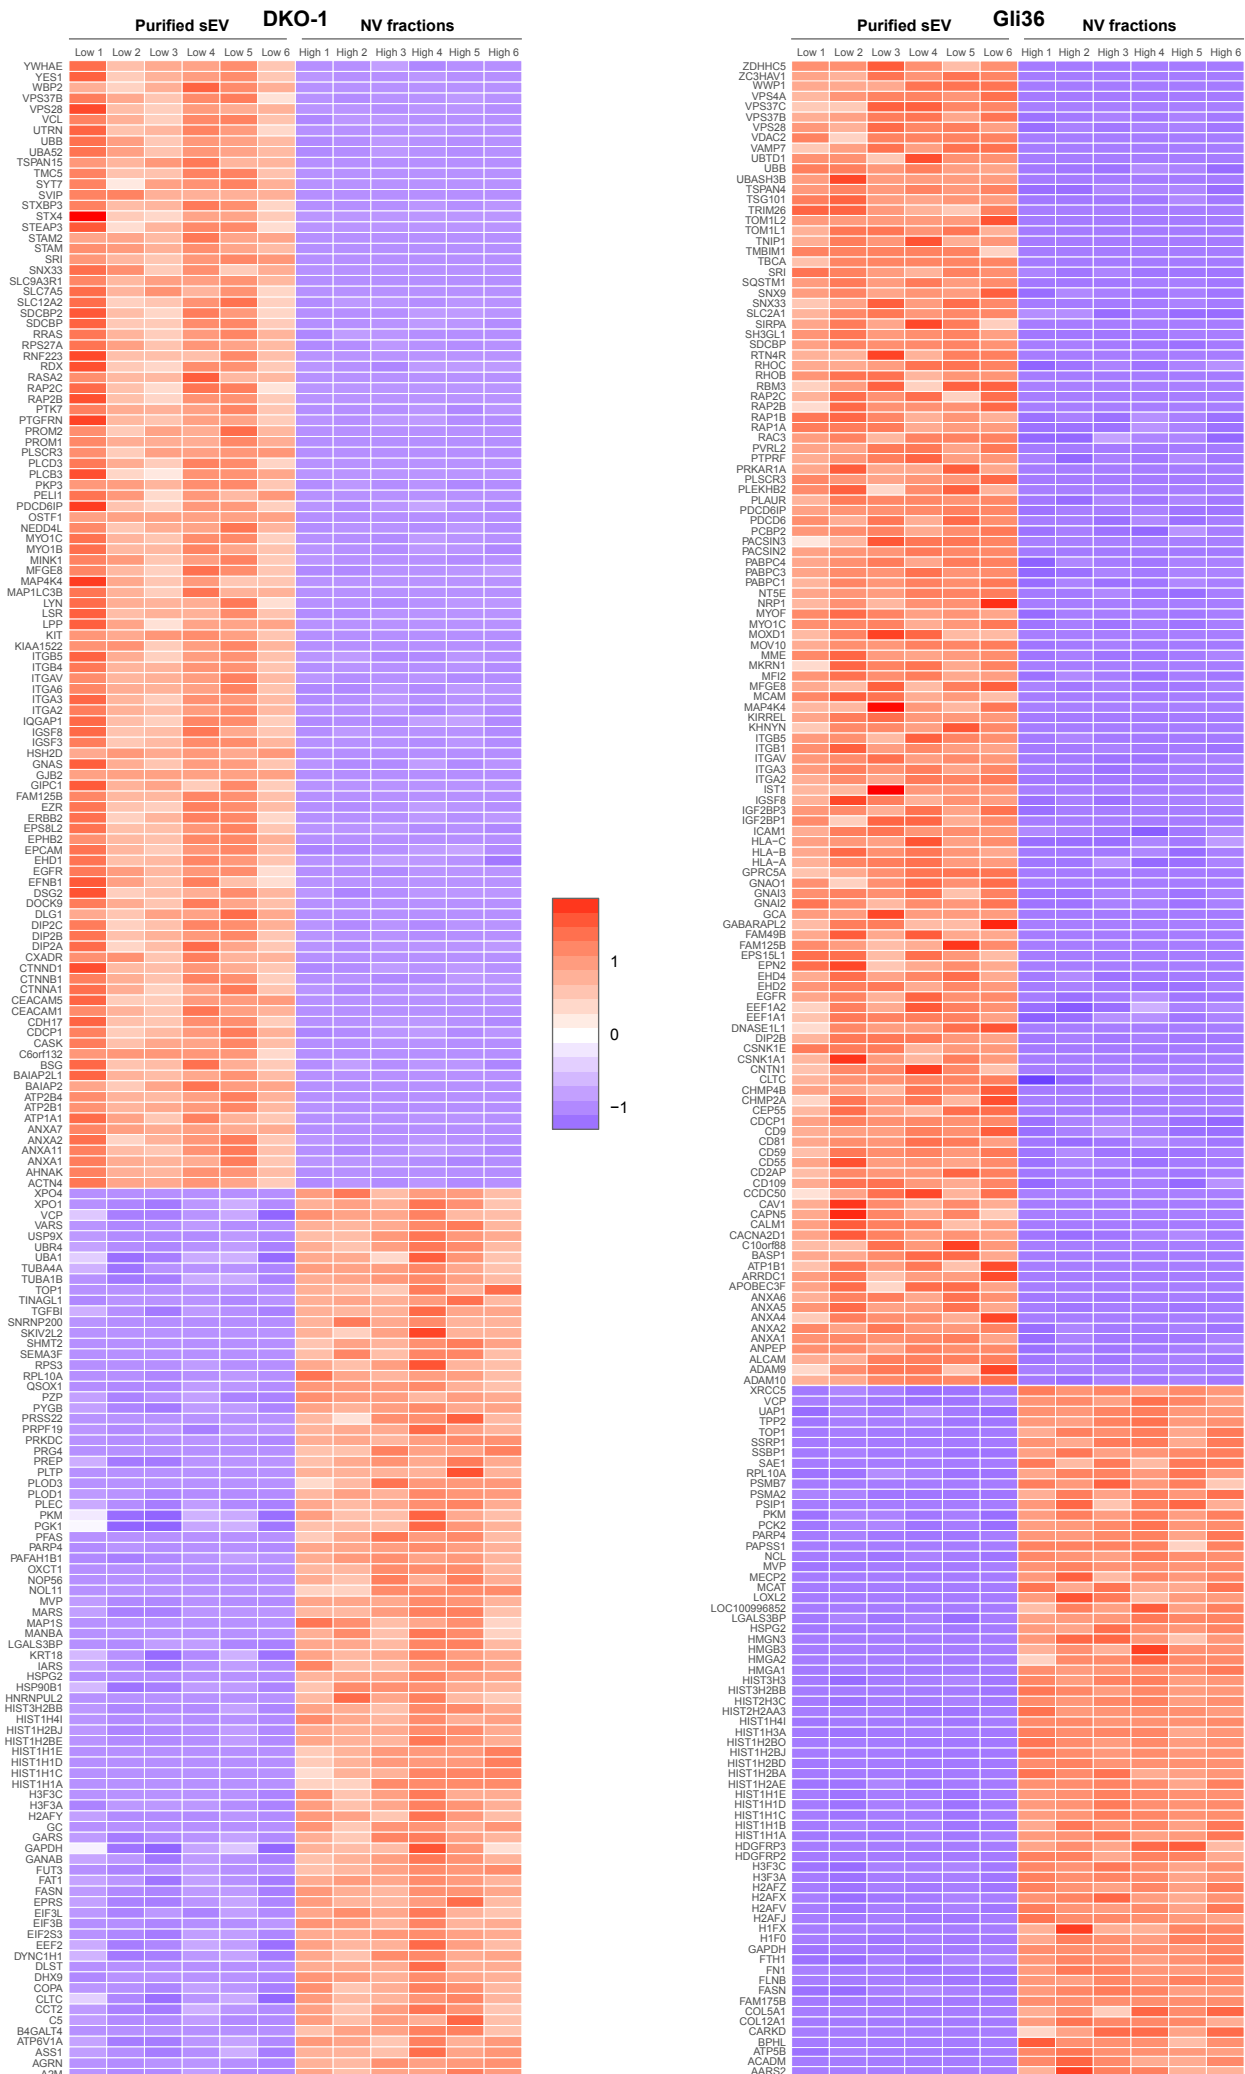

**Table S2. Top 200 proteins most significantly differentially expressed between purified sEV and non-vesicular (NV) fractions, Related to Figure 2.** Small EVs (low density) and non-vesicular (high density) fractions were separated by high-resolution density gradient centrifugation followed by proteomic analysis. Heat map scale indicates intensity, defined as  $\Delta(\text{spectral counts} - \text{mean spectral counts})/\text{standard deviation}$ .

| DKO-1     |          |          |               | Gli36    |               |
|-----------|----------|----------|---------------|----------|---------------|
| Cell      | Large EV | Small EV | Non-vesicular | Small EV | Non-vesicular |
| GAPDH     | AHNAK    | PDCD6P   | PKM           | CLTC     | GAPDH         |
| EEF2      | GAPDH    | PDCD6P   | CLTC          | PDCD6P   | HIST1H4I      |
| HSP90AA1  | PKM      | AHNAK    | PKM           | PDCD6P   | MVP           |
| HSP90AB1  | ACTG1    | SDCBP    | PKM           | GAPDH    | PGK1          |
| KRT18     | PKM      | SDCBP    | DYNC1H1       | NTSE     | CLTC          |
| KRT8      | PKM      | SDCBP    | GAPDH         | ANPEP    | FTH1          |
| EEF1A1    | ANXA2    | NTSE     | MVP           | SDCBP    | PKM           |
| FLNA      | HSPG2    | NTSE     | FAT1          | SDCBP    | HSP90AB1      |
| PKM       | FLNA     | ITGB4    | FASN          | HSPA8    | PKM           |
| AHNAK     | FLNB     | ITGB4    | PGK1          | EEF1A1   | HIST1H4A      |
| ACTG1     | IQGAP1   | DFP2B    | HSPG2         | UBB      | FASN          |
| ENO1      | DYNC1H1  | PKM      | HSP90AA1      | HSPA1A   | VCP           |
| PLEC      | ENO1     | GAPDH    | EEF2          | ENO1     | FLNB          |
| PLEC      | CLTC     | PKM      | FLNB          | PGK1     | DYNC1H1       |
| TUBB      | EZR      | CLTC     | MYH9          | HSP90AB1 | FN1           |
| PKM       | AGRN     | ITGA6    | PRKDC         | PABPC1   | HIST2H3C      |
| PKM       | MYH9     | PKM      | HSP90AB1      | EEF1A2   | TUBB          |
| HSPD1     | MYO1C    | ITGA6    | UBR4          | HLA-A    | FLNA          |
| TUBB4B    | PSK1     | ACTG1    | AGRN          | HSPA8    | PCK2          |
| FASN      | ALDOA    | PTGFRN   | VCP           | HSP90AA1 | HSP90AA1      |
| HSPA8     | SPTAN1   | CTNND1   | PLEC          | PKM      | ATP5B         |
| TUBB4A    | HSP90AA1 | EZR      | PLEC          | DYNC1H1  | PARR4         |
| TUBB2B    | ACTN4    | MYO1C    | UBA1          | ACTG1    | H3F3A         |
| CLTC      | ITGB4    | HSPA8    | TUBB4B        | MYO1C    | TUBB4B        |
| MYH9      | SPTBN1   | IQGAP1   | ENO1          | EH2      | HIST2H2AA3    |
| TUBA1B    | ITGB4    | DYNC1H1  | TUBB          | PABPC4   | ACTG1         |
| SPTAN1    | ACTA1    | MYOF     | HIST1H4I      | FTH1     | HSP90B1       |
| FLNB      | CTNND1   | CD81     | TUBA1B        | MOV10    | EEF2          |
| SPTBN1    | SPTBN1   | ENO1     | EPRS          | MIE      | HIST1H2BD     |
| DYNC1H1   | HSP90AB1 | SLC12A2  | TGFB          | PKM      | UBA1          |
| TUBA1C    | MYO1B    | ANXA2    | KIAA1199      | HLA-B    | HSPA8         |
| SPTBN1    | MYO1B    | PLXNB2   | PARR4         | CLTCL1   | H2AFZ         |
| NCL       | ACTG2    | PGK1     | TUBA1C        | ANXA8    | H2AFJ         |
| PRKDC     | PLEC     | ITGB1    | ACTG1         | ANXA2    | PYGL          |
| TUBB2A    | PLEC     | UBB      | TUBB4A        | TLN1     | TUBB2A        |
| TUBA4A    | MYOF     | ATP1A1   | CLTCL1        | TUBB     | SERPINE1      |
| EEF1A2    | NTSE     | RPS27A   | TUBB2A        | SGSTM1   | TUBB4A        |
| HIST1H4I  | HSPA8    | UBA52    | TUBB2B        | MYOF     | HIST1H2BD     |
| ALDOA     | MYO1D    | FLNB     | PDCD6P        | TUBA1B   | VIM           |
| HSP90B1   | ITGA6    | ITGAV    | LGALS3BP      | MF12     | HSPA8         |
| VCP       | ITGA6    | CTNND1   | PDCD6P        | FLNA     | NAMPT         |
| XRCC5     | PLXNB2   | MYO1D    | GANAB         | EGFR     | H2AFY         |
| HNRNP1    | YWHAZ    | HSP90AA1 | TUBA4A        | SH3GL1   | HIST1H2AE     |
| LRPPRC    | NTSE     | ITGA3    | HSPA8         | CACNA2D1 | TOP1          |
| HSPA5     | POTEE    | HSPA1A   | GANAB         | SLC3A2   | H2AFY         |
| HNRNP1    | FASN     | MFG8     | CCT2          | ITGB1    | TUBA1B        |
| UBA1      | LDHA     | ADAM10   | HSP90B1       | TUBA1C   | MYH9          |
| CCT2      | EEF1A1   | CTHFP1   | IRS           | HSP90B1  | HIST1H3       |
| ANXA2     | EEF2     | IGSF8    | HIST1H2BE     | DDA1     | ENO1          |
| ACTN4     | ITGB1    | CASK     | QSOX1         | ANXA5    | H2AFV         |
| EPRS      | ATP1A1   | EPCAM    | FLNA          | LDHA     | HSPA1A        |
| ACTA1     | PDCD6P   | CD9      | LDHA          | TUBB4B   | HSPG2         |
| GANAB     | PDCD6P   | CTNNA1   | XPO1          | EEF2     | HIST1H2BJ     |
| XRCC6     | CTNNA1   | ALDOA    | HIST1H2BJ     | IGSF8    | TUBA1C        |
| GANAB     | TUBB     | SLC2A1   | TUBB3         | DIF2B    | LGALS3BP      |
| LDHB      | EPCAM    | MYO1B    | WDR1          | KRT1     | GARS          |
| HNRNP2B1  | RDX      | FAT1     | KRT18         | ITGAV    | H2AFX         |
| TUBA8     | HSPA5    | MYO1B    | PKG2          | ICAM1    | H3F3C         |
| KRT19     | TUBB4B   | PDCD6P   | ALDOA         | SNX33    | TUBB6         |
| GCN1L1    | VCP      | HSP90AB1 | GFP11         | TUBA4A   | XRCC6         |
| HNRNP1    | SLC2A1   | JUP      | PYGL          | HSPA1L   | HIST1H1D      |
| LDHA      | HIST1H4I | EPH2     | CAND1         | PTPRF    | HIST1H1C      |
| LMNA      | TPH1     | GNAI2    | COPA          | EH2      | EPRS          |
| P4HB      | CTNND1   | ITGA2    | HIST1H2BB     | TUBB2A   | HIST1H1E      |
| CCT4      | KRT8     | TLN1     | KPNB1         | PABPC3   | TLN1          |
| TUBB6     | UBA1     | ACTA1    | DPYSL2        | FLNB     | TUBA4A        |
| RPL3      | UTRN     | FLNA     | ASB1          | UBA1     | TUBB3         |
| NPM1      | TLN1     | LDHA     | HSPA5         | TUBB4A   | XRCC6         |
| RPL4      | ACTG2    | SLC3A2   | TLN1          | TPH1     | H1FO          |
| HNRNP1    | FAM128B  | ATP2B1   | KRT8          | CDCP1    | ACTC1         |
| ACTG2     | GPI      | RDX      | PGM1          | VPS37B   | FLNC          |
| LMNA      | ACTBL2   | NCKAP1   | IPO7          | HSPA2    | GANAB         |
| TUBA3E    | KRT18    | GNAI3    | RNPEP         | FASN     | OAT           |
| HIST1H2BE | JUP      | UTRN     | PSMD2         | ACTC1    | FSCN1         |
| PDIA3     | ACTN1    | YWHAZ    | CCT8          | KRT10    | ATC           |
| HSPA9     | EPH2     | FASN     | ACYL          | TSG1D1   | HIST2H2AB     |
| YWHAZ     | MYH14    | EEF1A1   | NAMPT         | FSCN1    | ACTG2         |
| EZR       | CFL1     | PKP3     | MYH14         | EH2      | CS            |
| EIF3A     | GNAI3    | CDCP1    | SNRNP200      | VIM      | ALDH1A3       |
| TPH1      | ITGAV    | MYH9     | HSPA1A        | HLA-C    | EEF1A1        |
| TUBB3     | GNAI2    | RAP1B    | TUBA8         | MSN      | MPEP          |
| POTEE     | TUBA1B   | EGFR     | CRZ           | CD2AP    | NDRG1         |
| SNRNP200  | TUBB2B   | POTEE    | LDHA          | HIST1H4I | HYOU1         |
| TLN1      | GFP11    | NEDD4L   | EP3L          | MYH9     | BANF1         |
| PGK1      | TUBB4A   | CD55     | VAR5          | CD81     | HSPA9         |
| DSF       | POTEE    | ACTN4    | CCT4          | HLA-C    | HIST1H1B      |
| SYNCRP    | VCL      | MRK1     | TUBA3E        | SNY9     | PDCD6P        |
| NPM1      | ANXA1    | ACTG2    | PGM1          | ADAM10   | AARS          |
| CFL1      | SFN      | TPH1     | PRSS23        | CFL1     | UAP1          |
| CCT6A     | LDHA     | VCP      | GARS          | ANXA11   | FTL           |
| HSPA4     | HSPA1A   | AP2B1    | ERO1L         | VCP      | PDCD6P        |
| IPO5      | TUBB2A   | PTK7     | CSE1L         | VPS28    | HIST1H2BB     |
| HIST1H2AM | HSP90B1  | LLGL2    | PLOD1         | ALDOA    | PXDN          |
| HSPH1     | TUBA1C   | IGSF3    | XRCC6         | CD55     | TUBA3E        |
| HIST1H3A  | WDR1     | UBA1     | ACTA1         | PTGFRN   | IARS          |
| IPO7      | CSF1     | PTK7     | USP9X         | PO2      | PLEC          |
| HIST2H2AC | CAND1    | EH2      | CCT8          | KRT2     | PYGB          |
| HMGB1     | POTEE    | RAP1A    | HUWE1         | CD59     | CLTCL1        |
| VCL       | ANXA5    | FAM129B  | EEF1A1        | MFG8     | HSPA4         |
| CALR      | MYO6     | SDCBP2   | SDCBP         | PYGL     | SBBP1         |

**Table S5. Top 100 most abundant proteins identified in cells, large EV and high-resolution density gradient purified sEV and non-vesicular fractions, Related to Figure 2.**

Proteomic analysis of DKO-1 cells, large EVs, small EVs and non-vesicular fractions (left), and Gli36 small EVs and non-vesicular fractions (right). Small EVs and non-vesicular fractions were separated by high-resolution density gradient fractionation. Proteins are ranked from top to bottom based on the number of spectral counts.
