# Supplementary material
Source: PubMed Central journal article supplement (PMC6664447)

**A**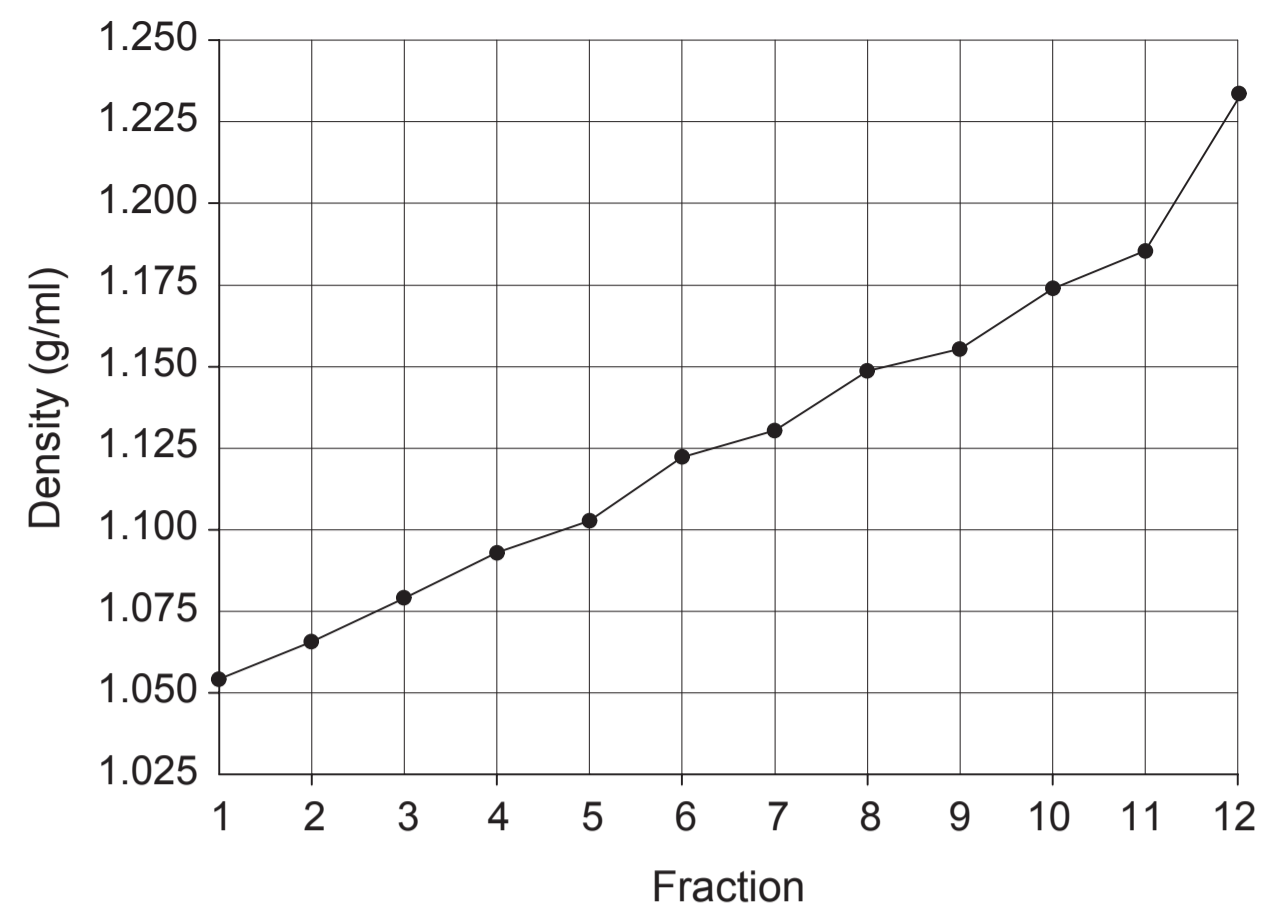**B**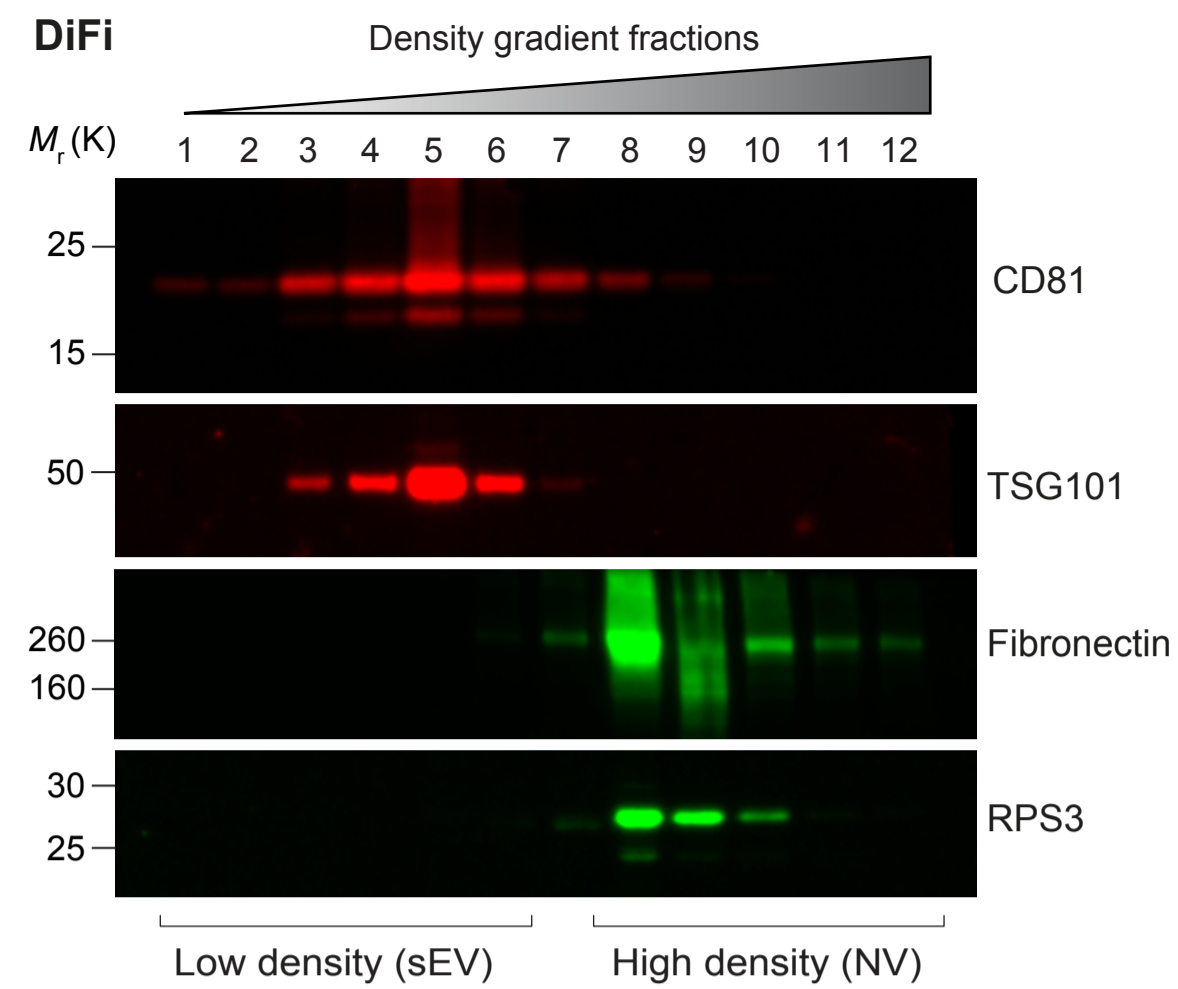**C**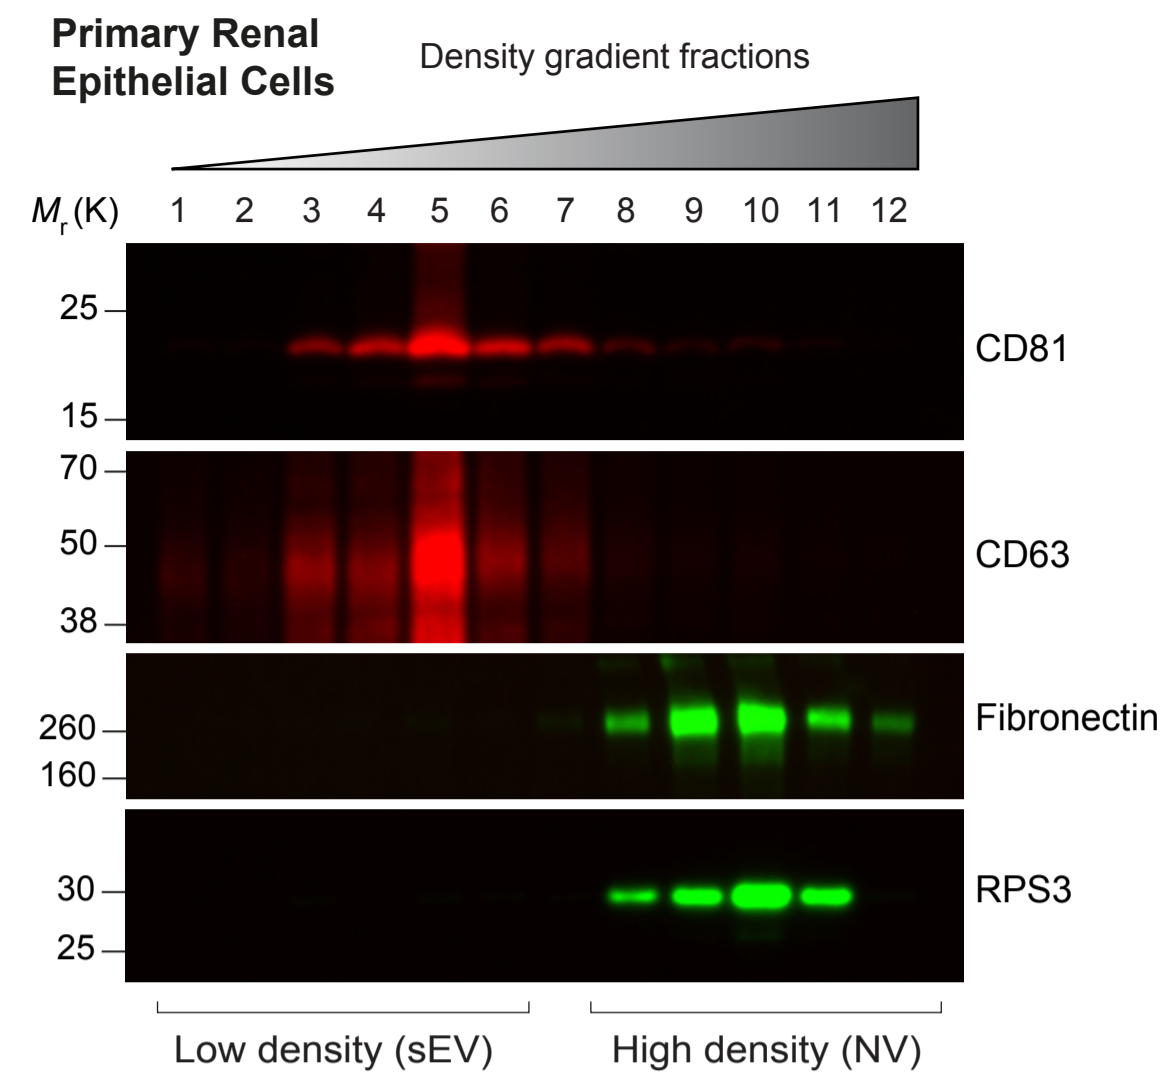**D**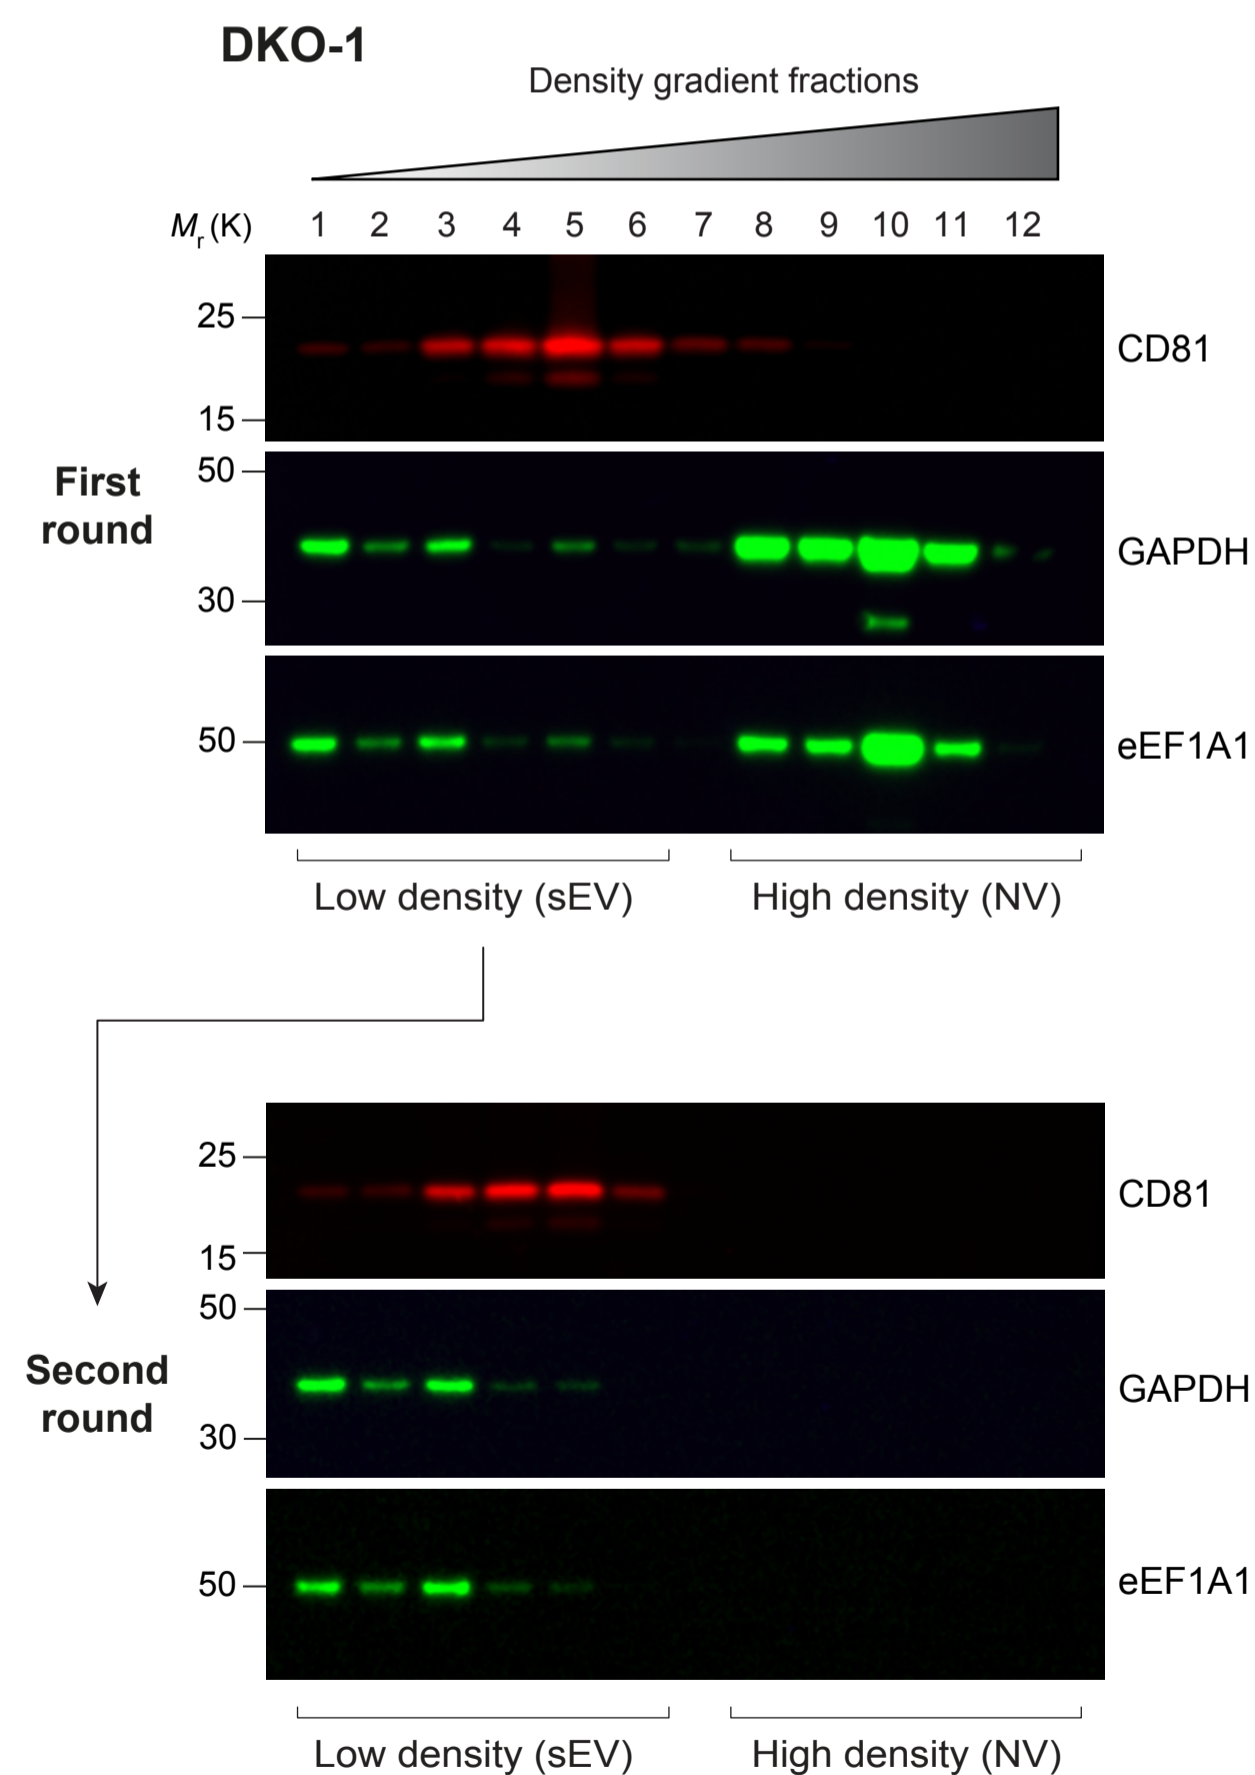**E**

DKO-1 low density (sEV) fraction

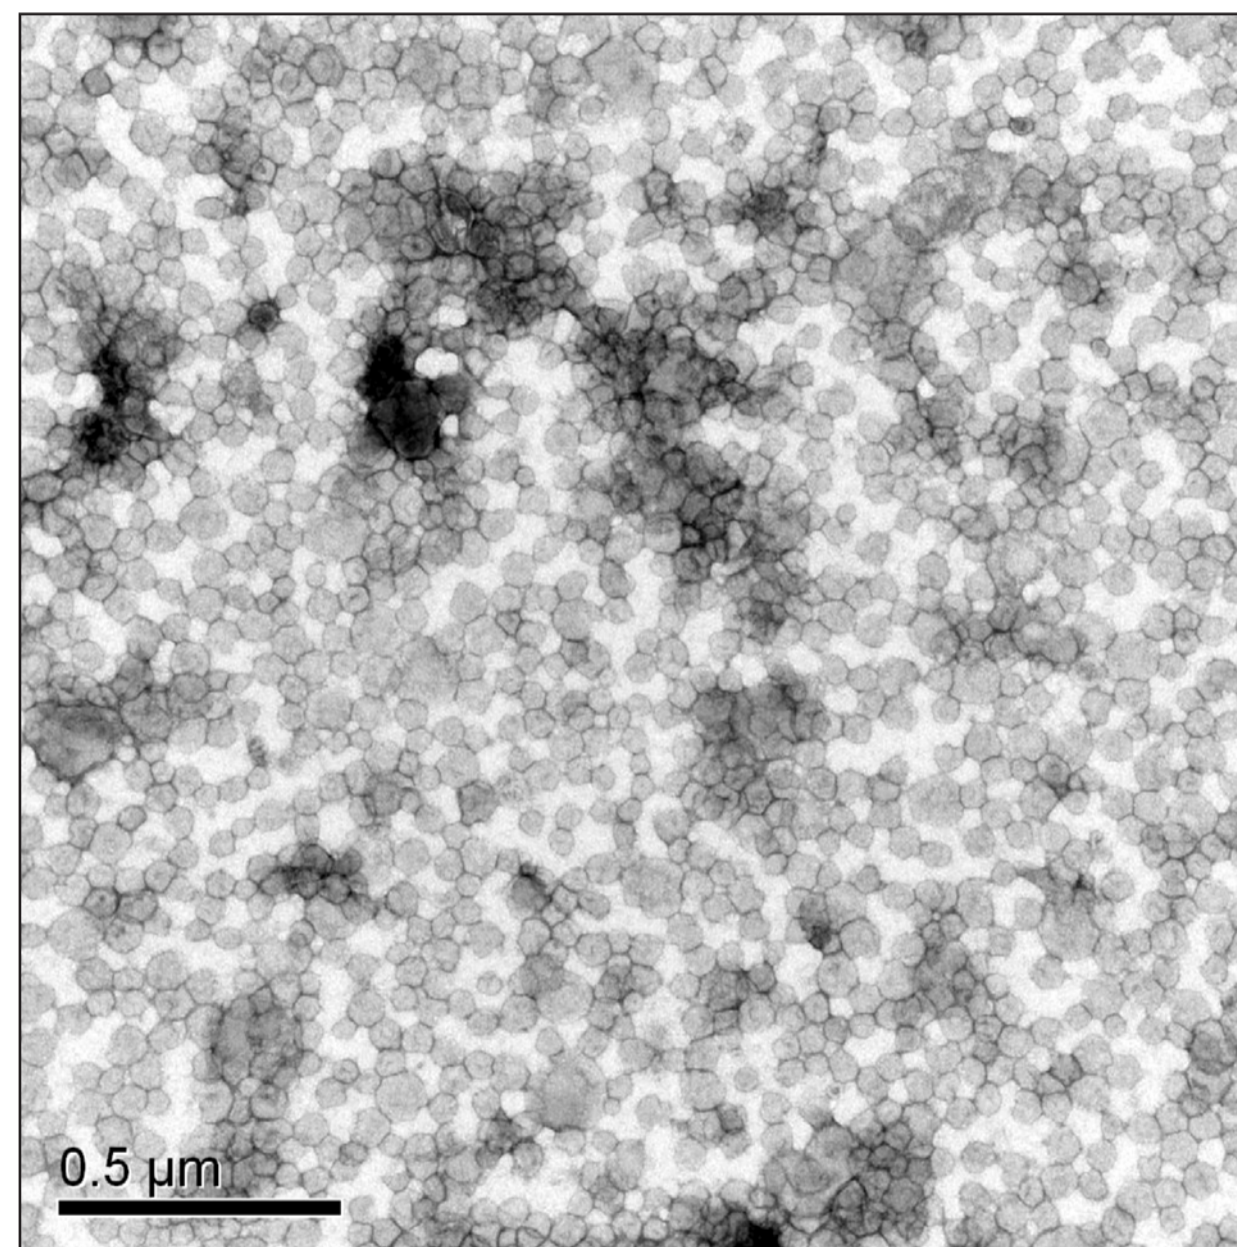

Gli36 low density (sEV) fraction

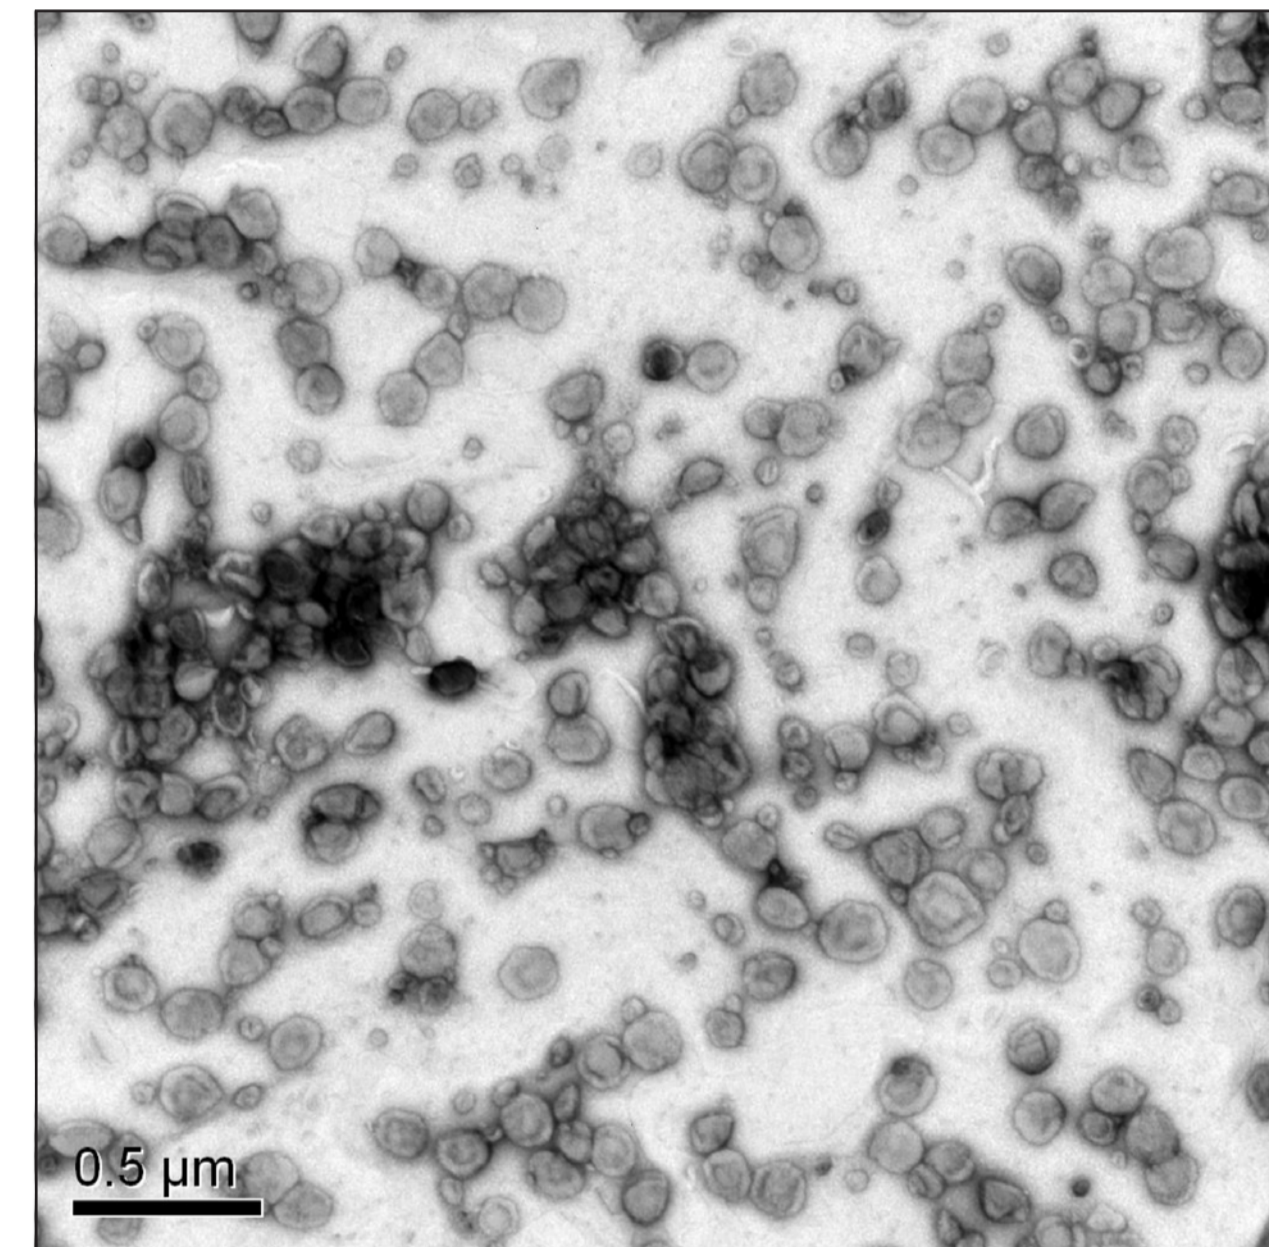**F**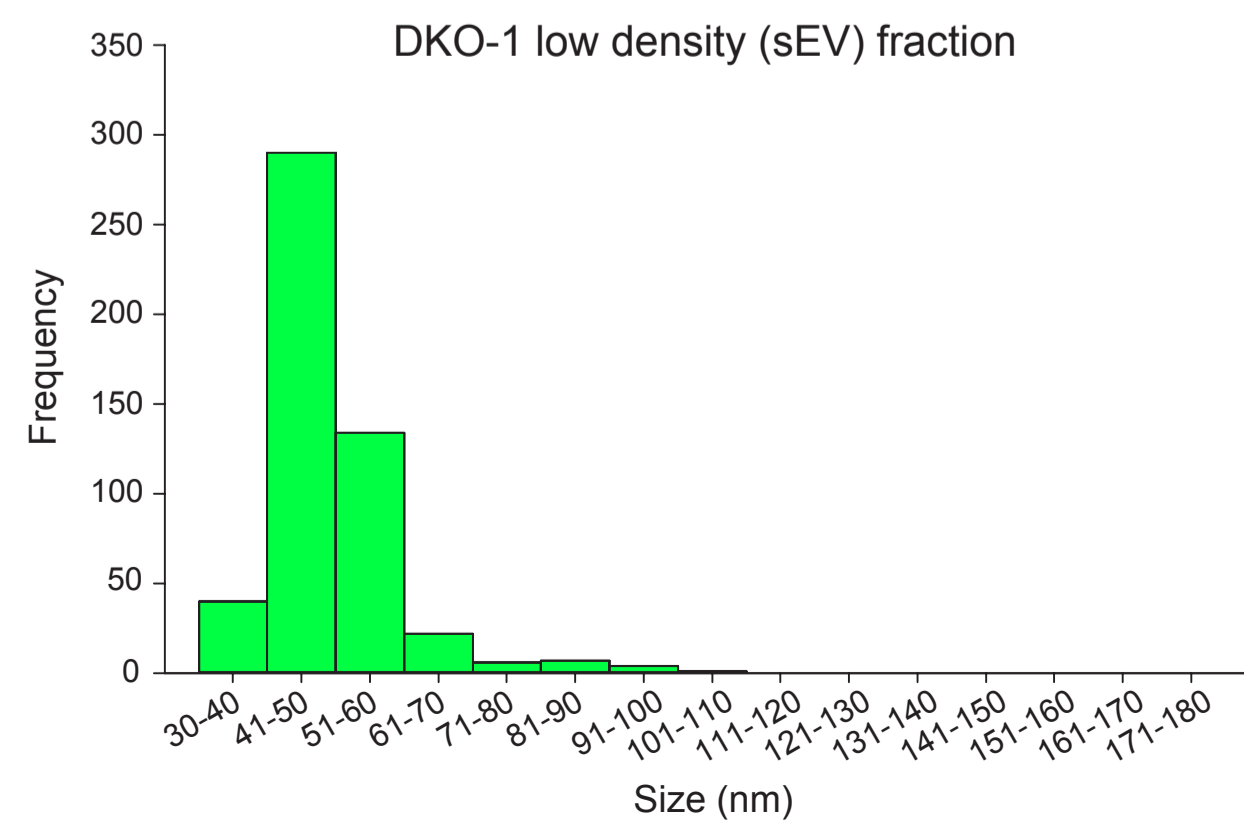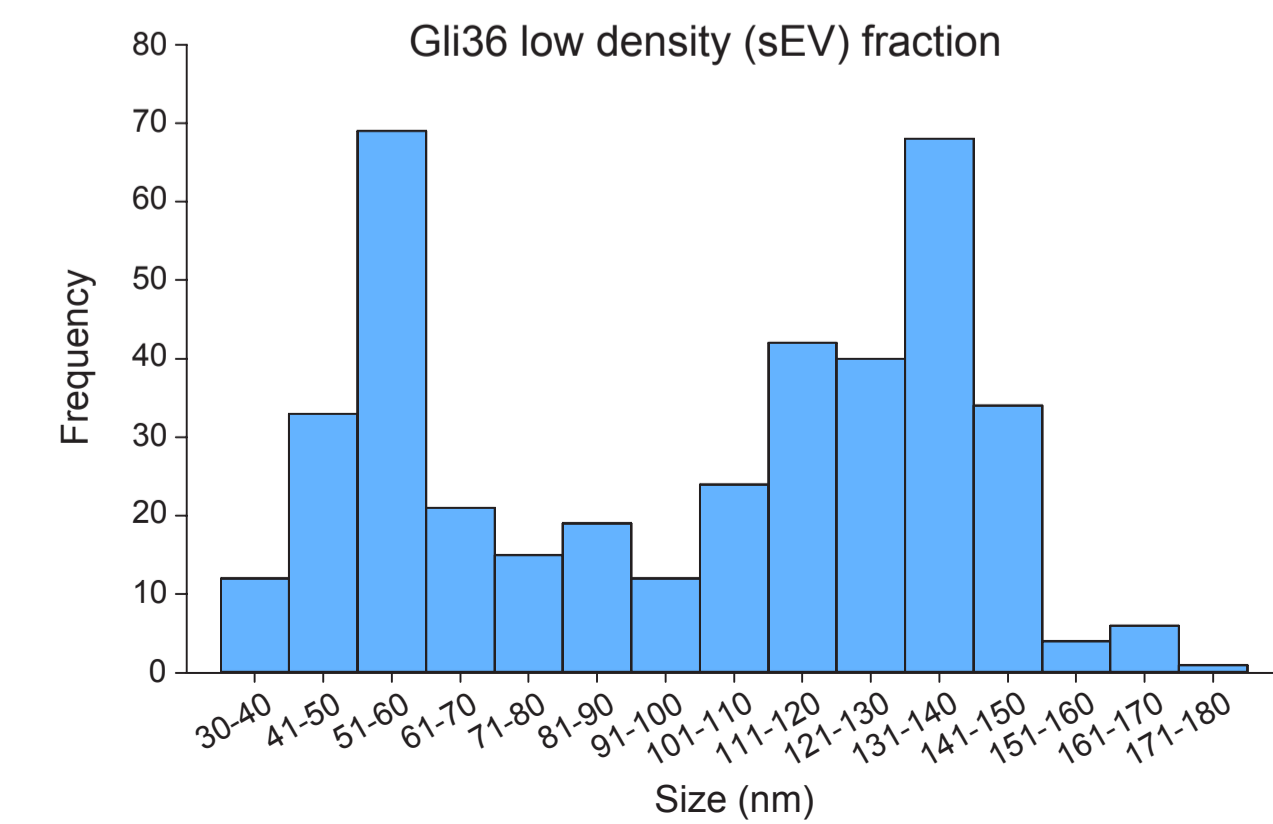

Supplement: NIHMS1525273-supplement-1.pdf [file NIHMS1525273-supplement-1.pdf]

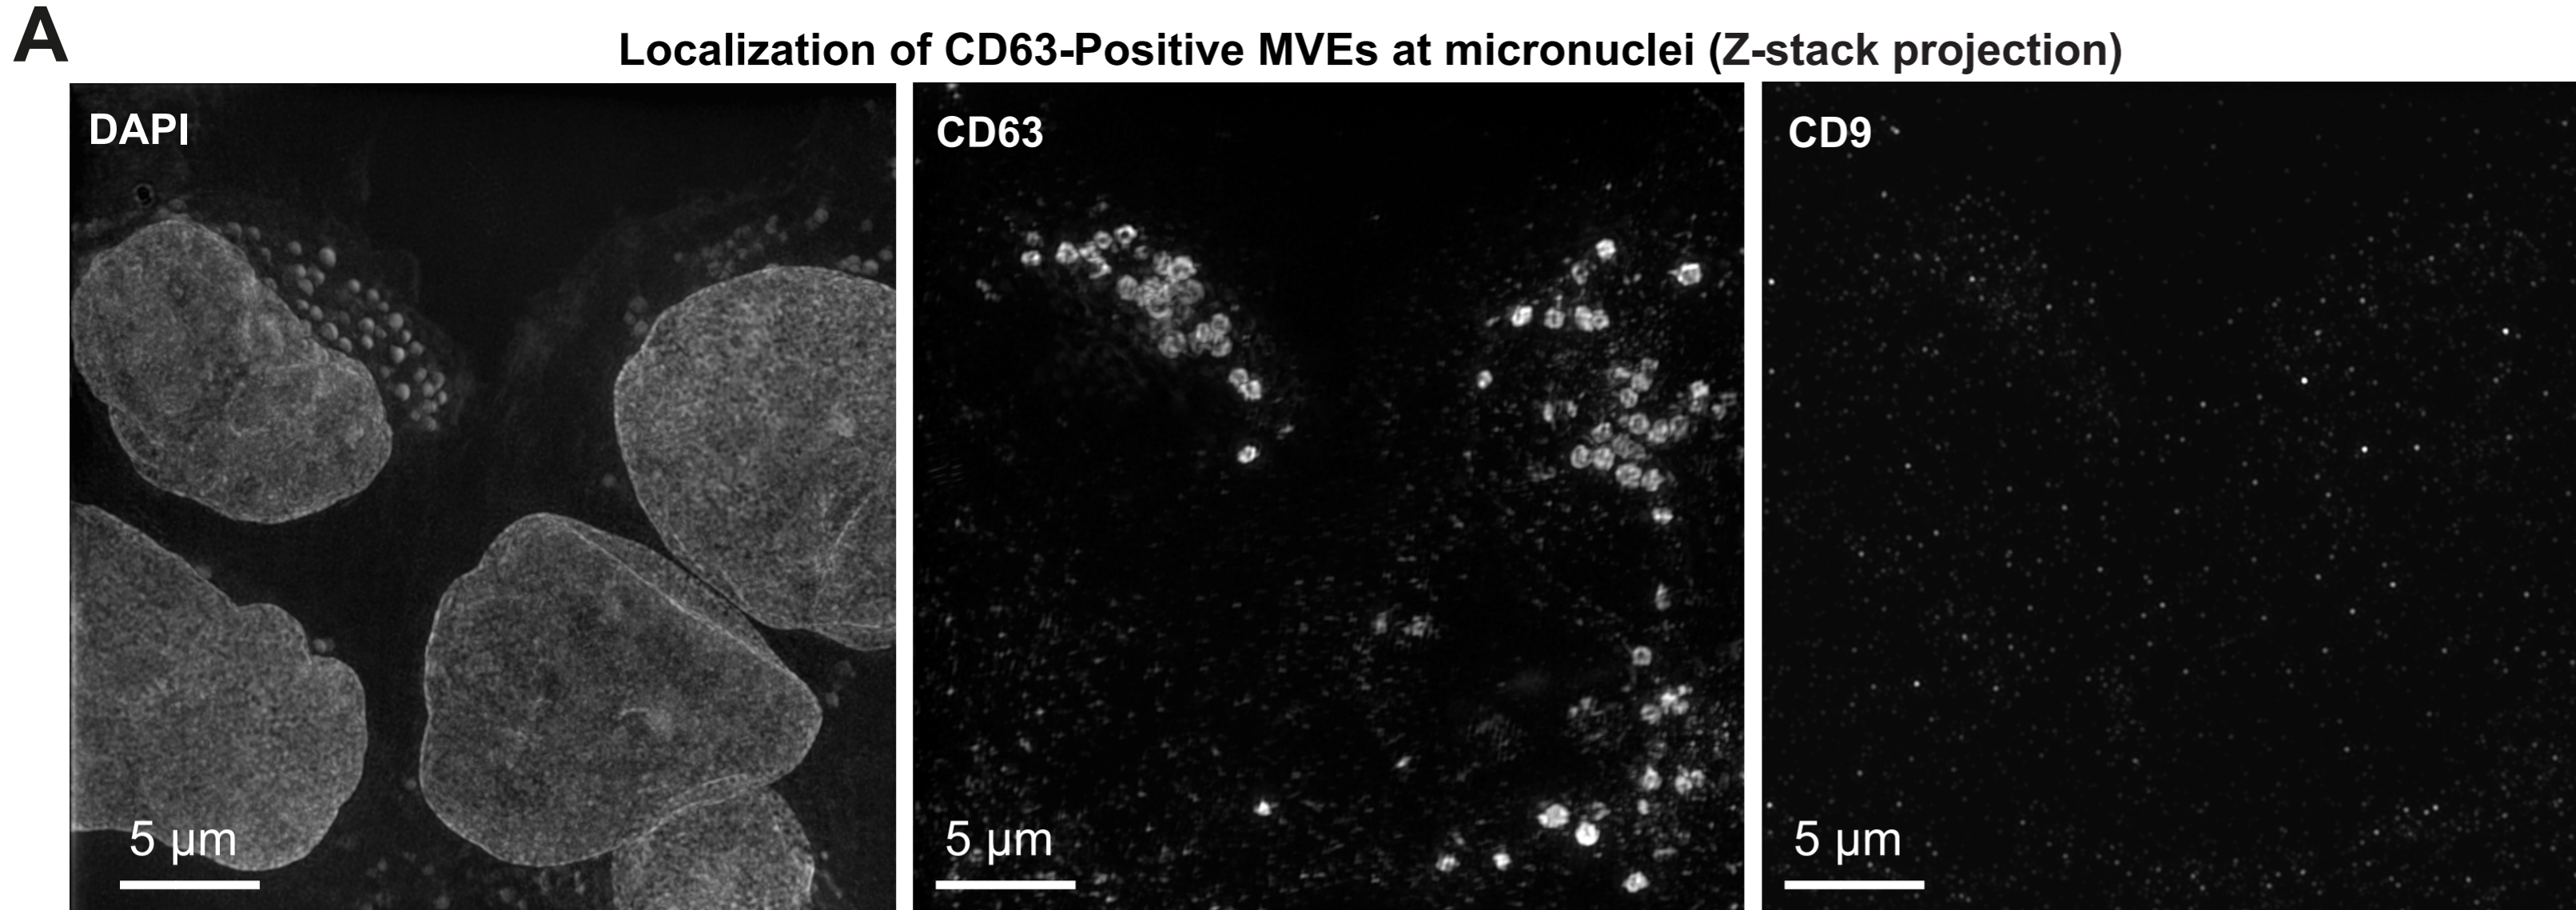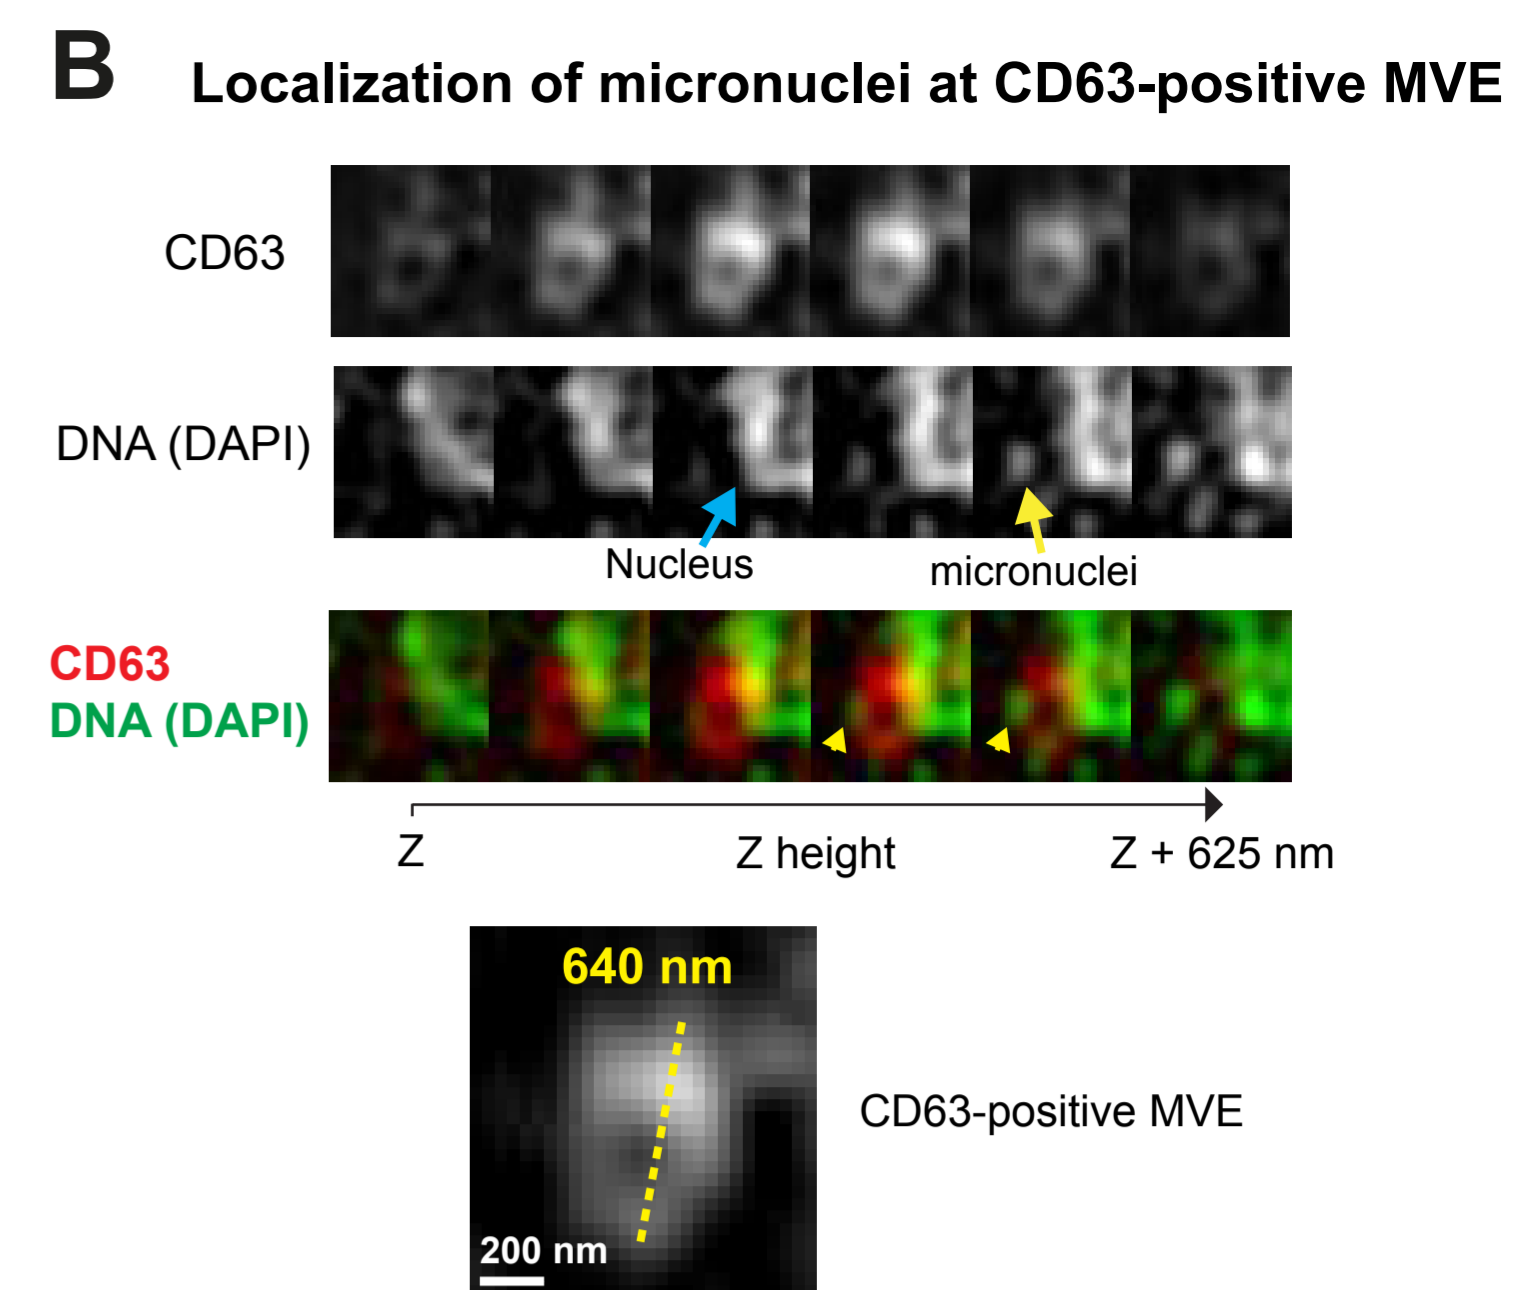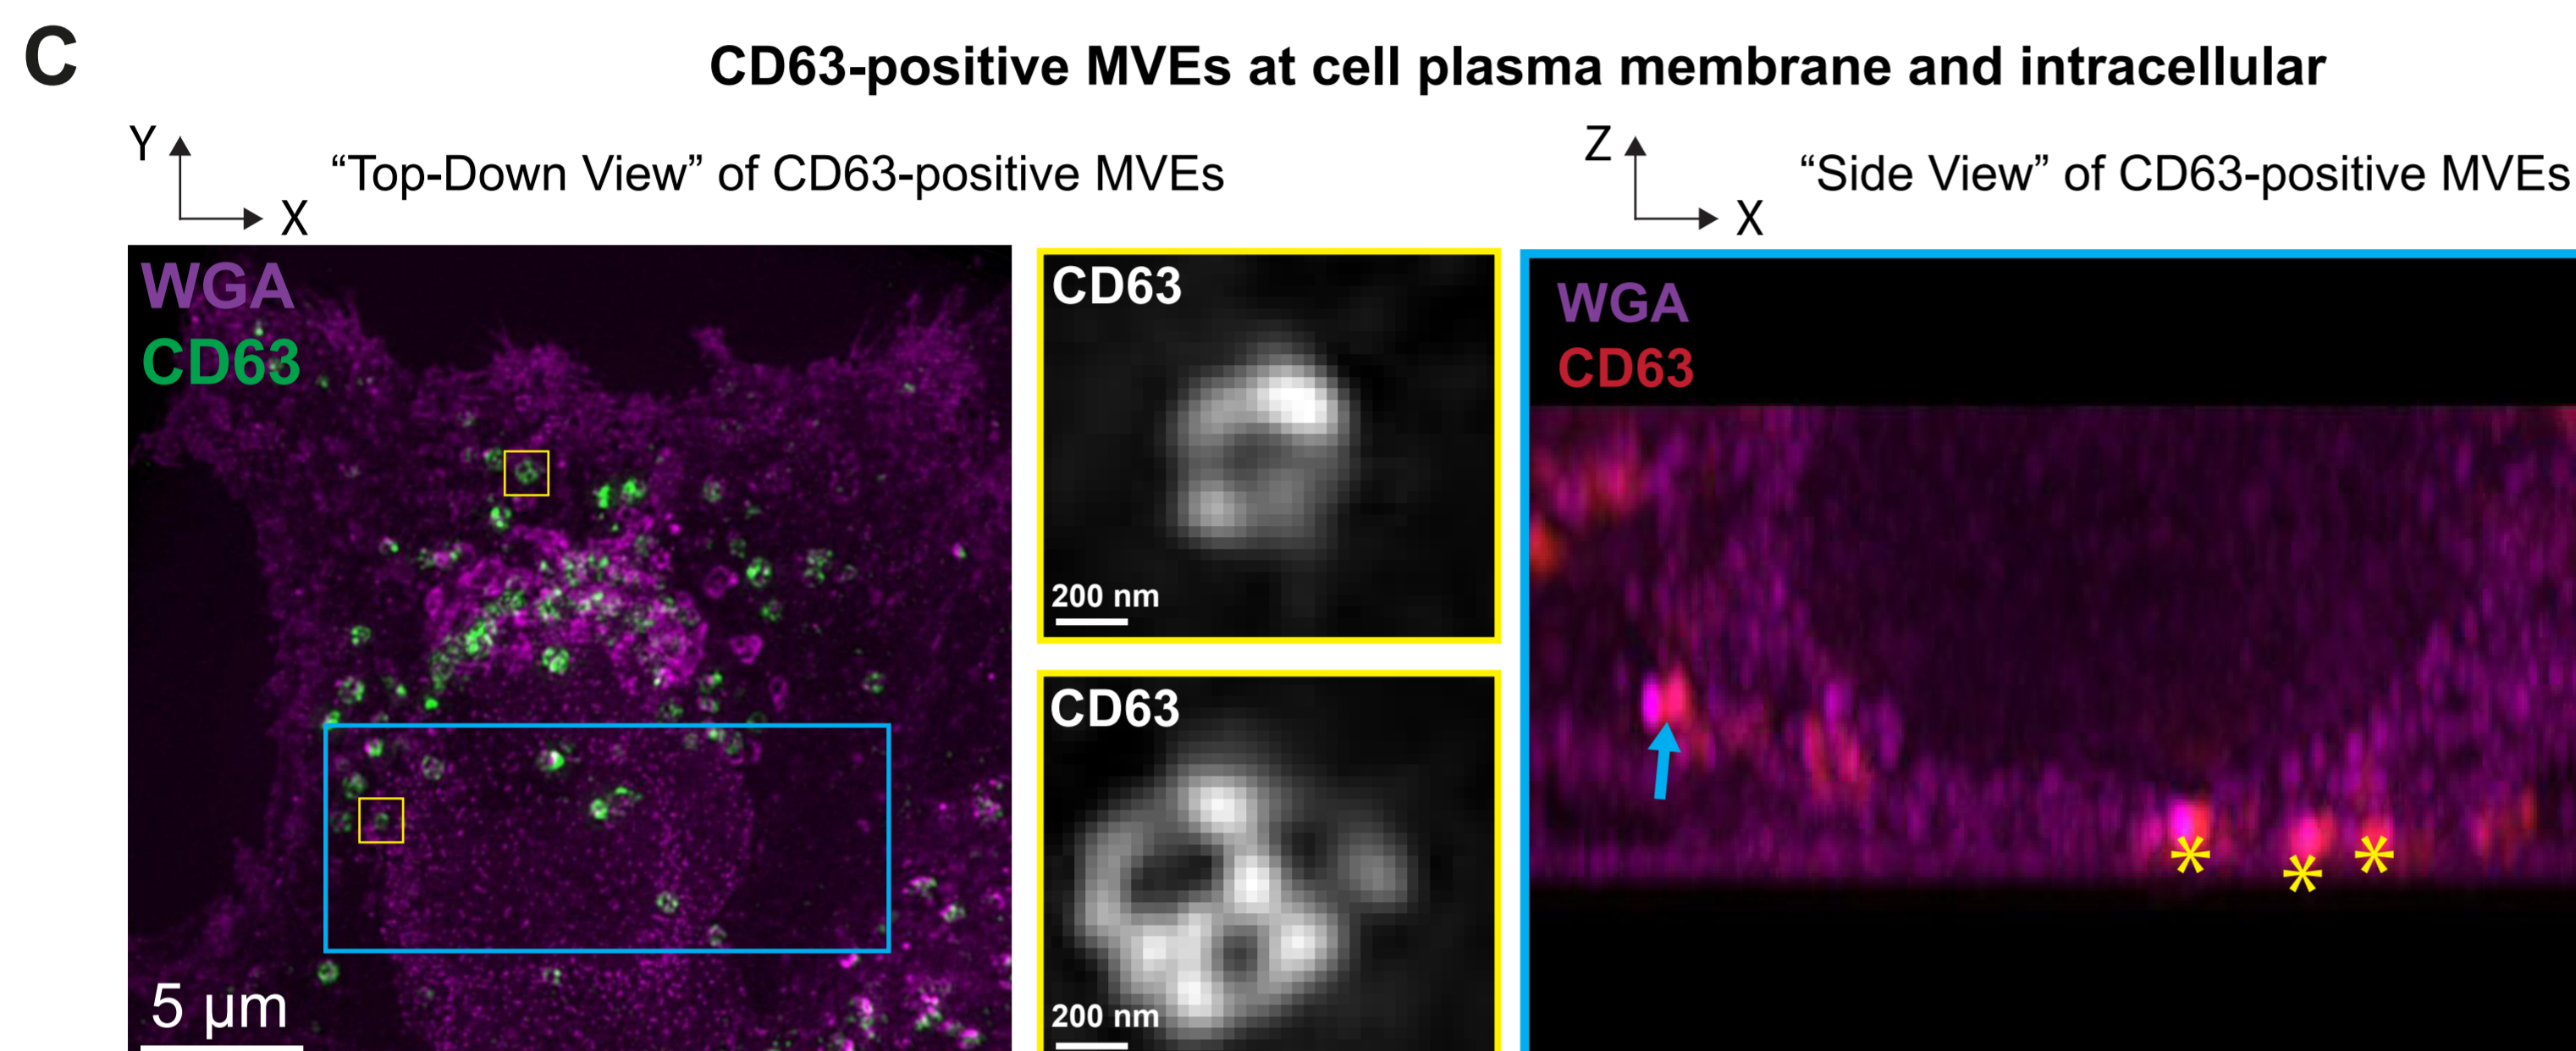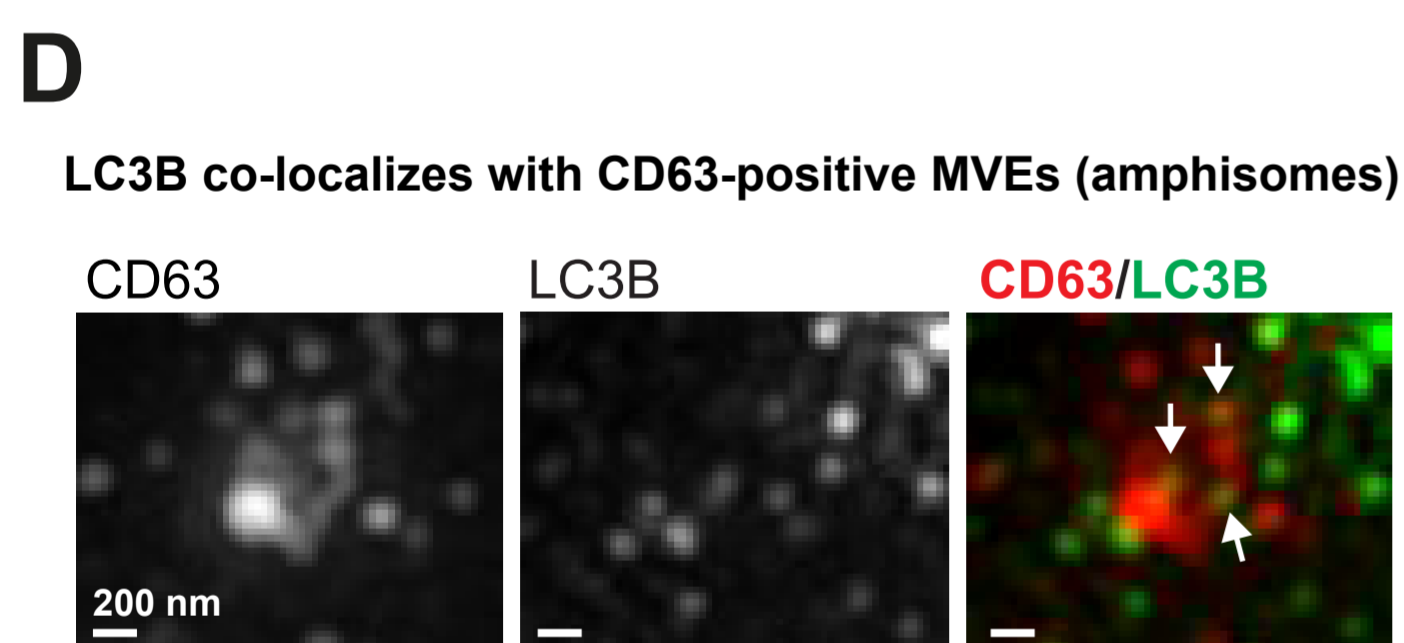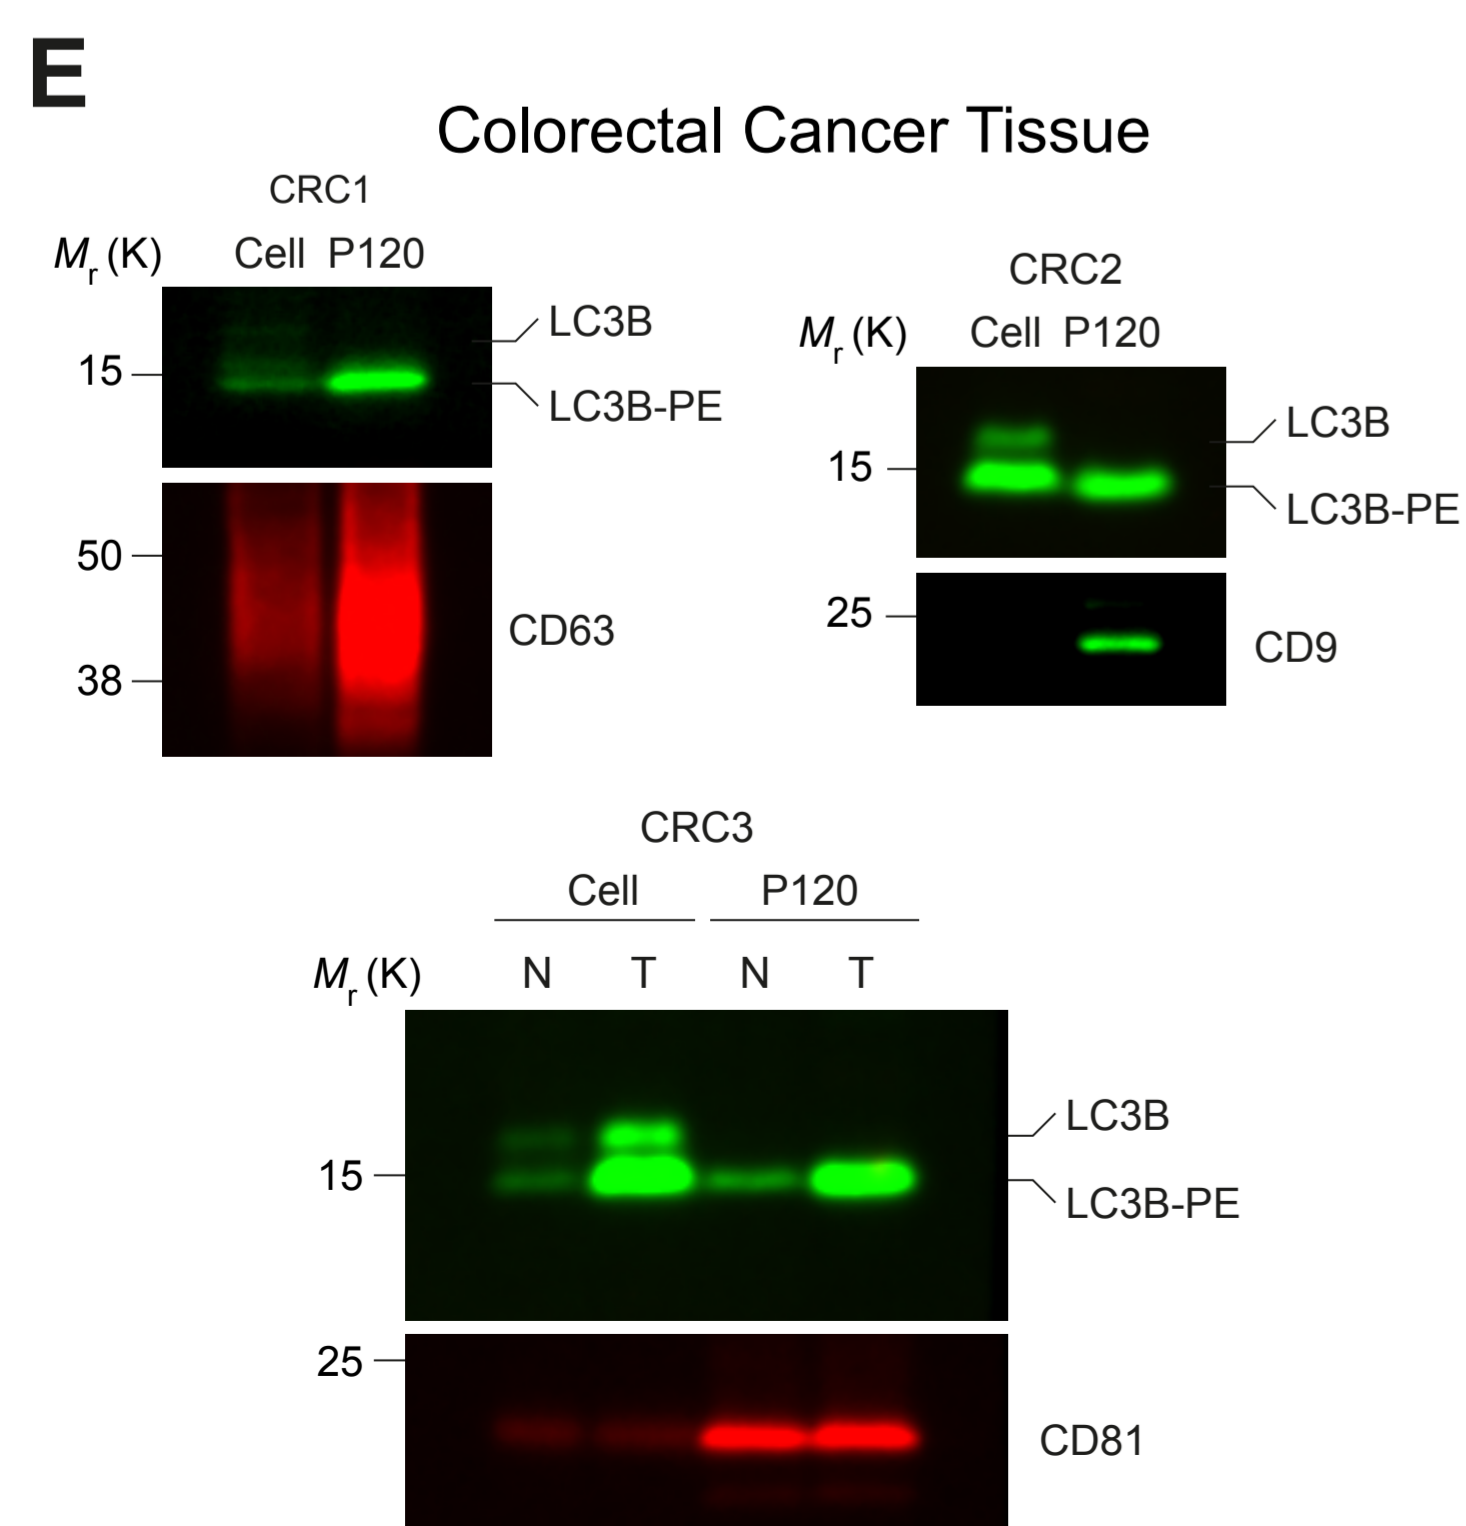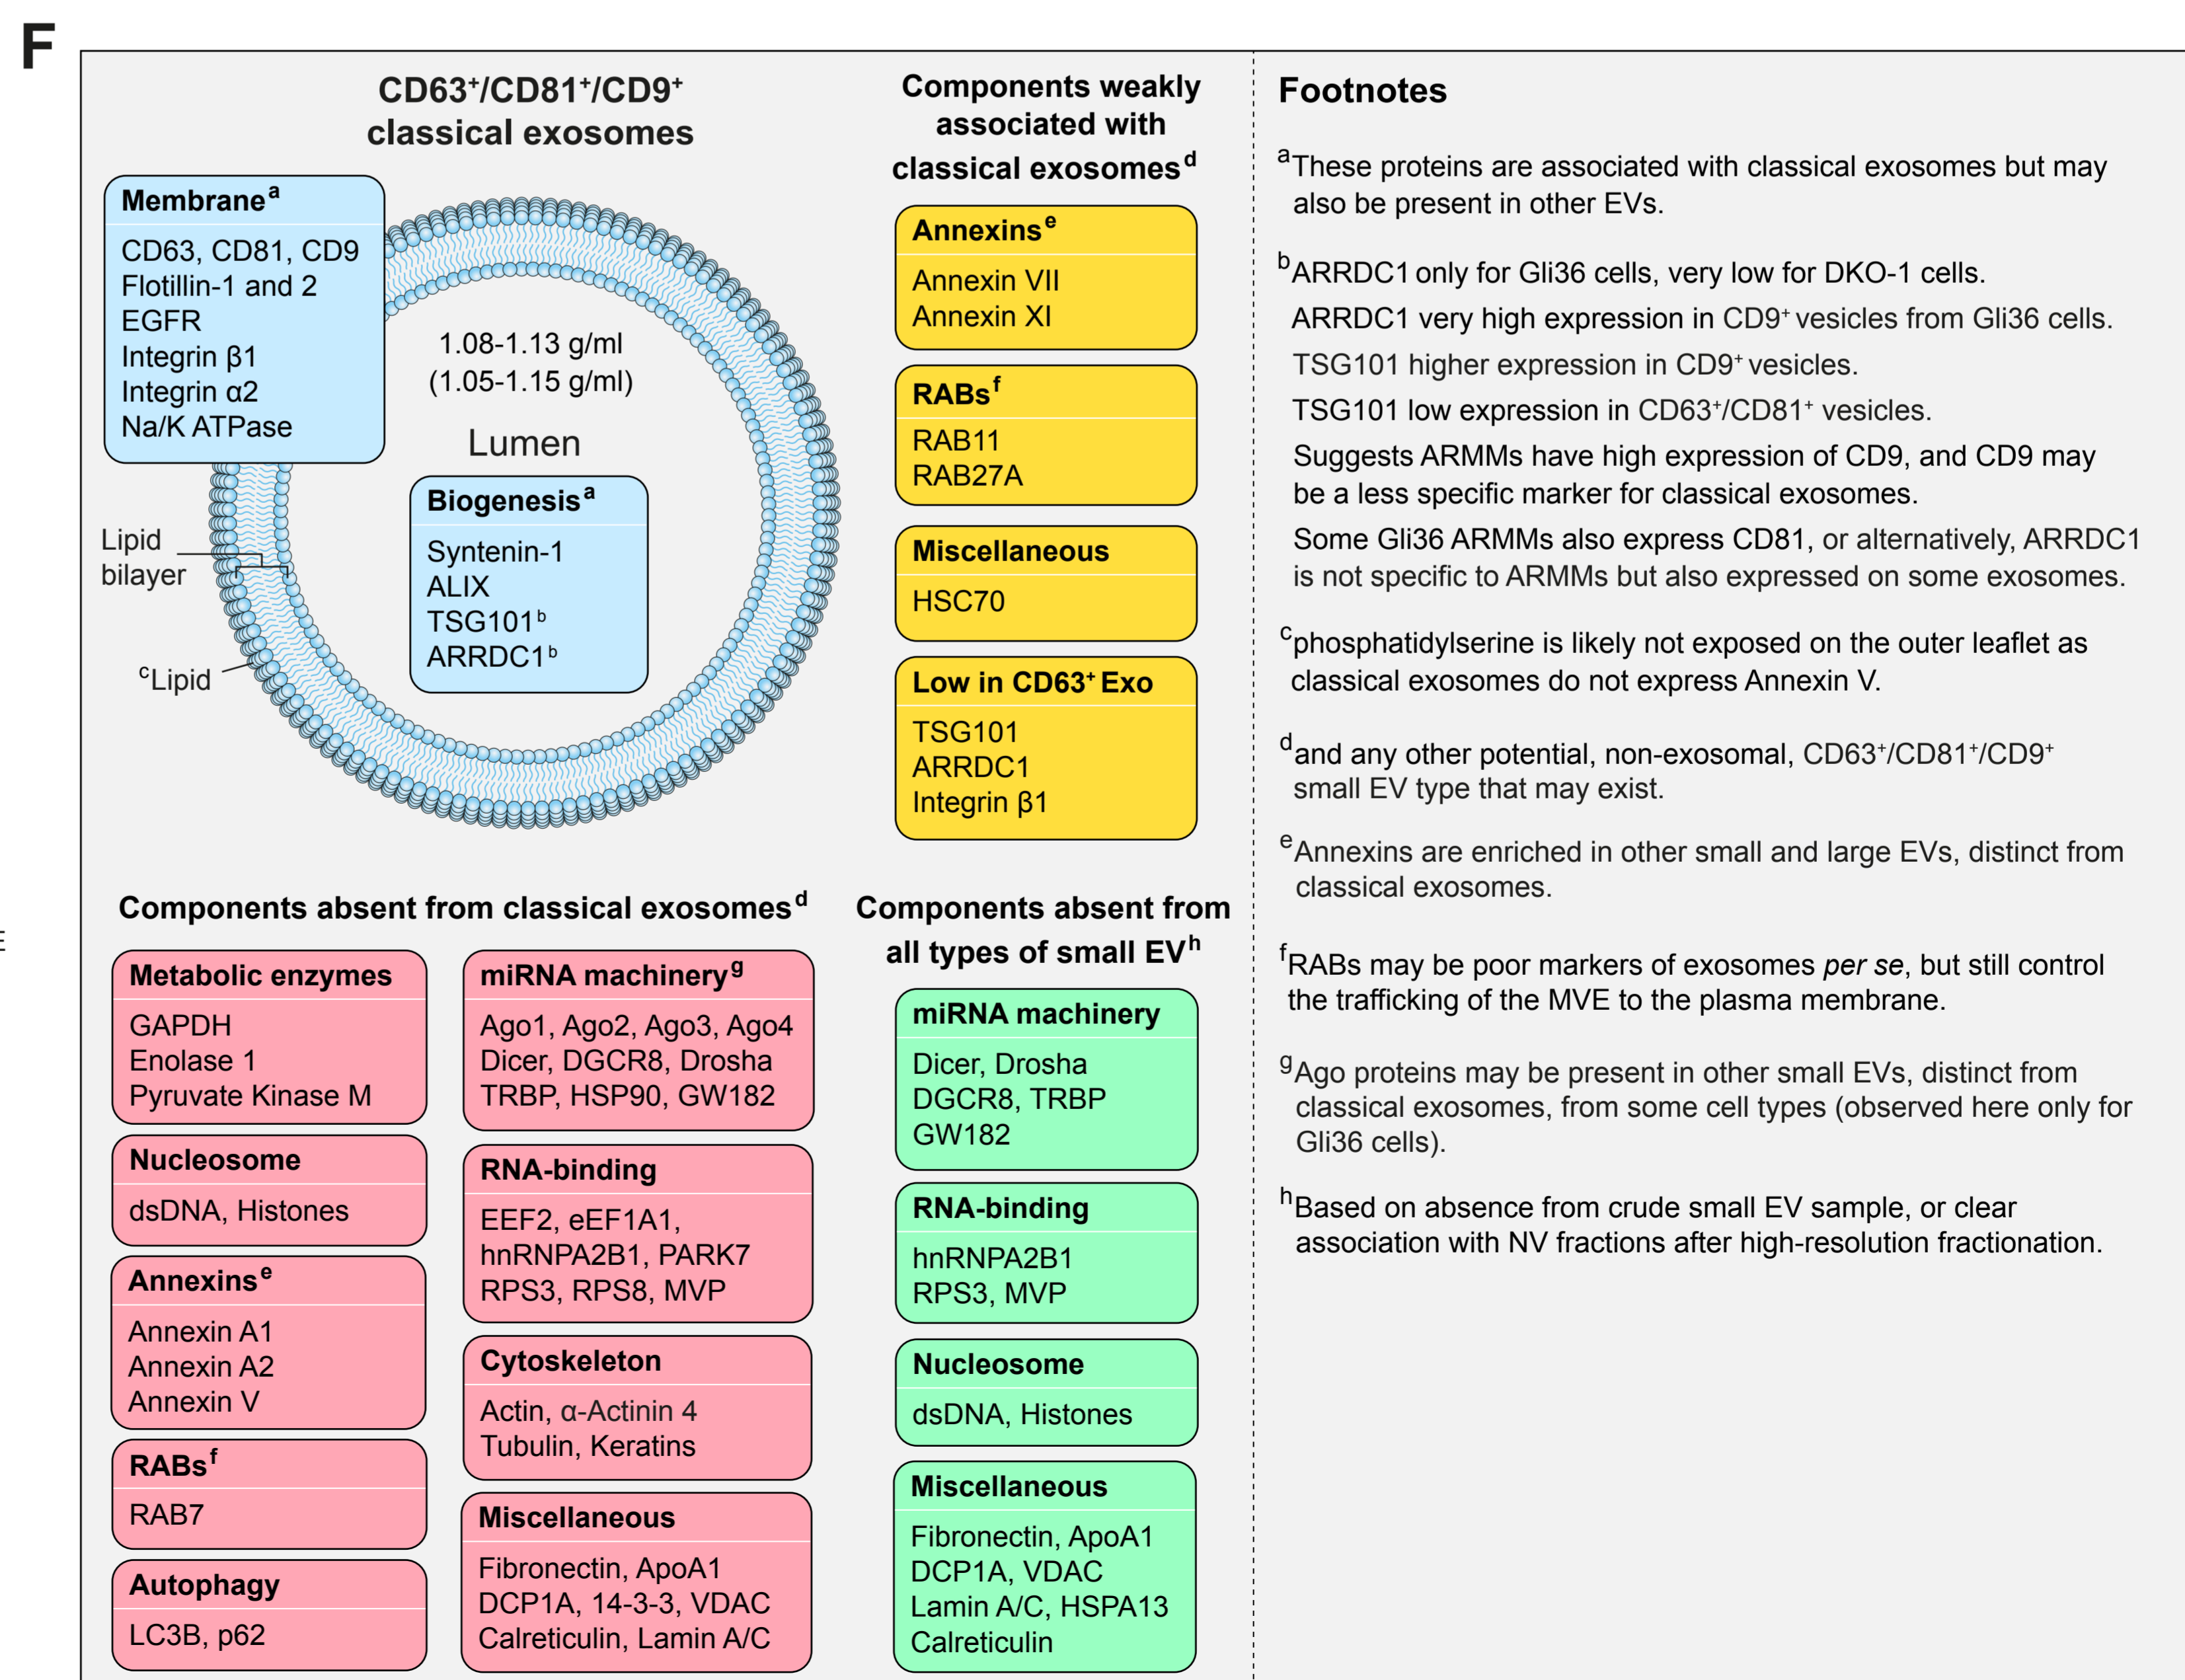

Supplement: NIHMS1525273-supplement-7.pdf [file NIHMS1525273-supplement-7.pdf]
